# Supplementary material for: A simple photoelectrochemical aptasensor based on MoS2/rGO for aflatoxin B1 detection in grain crops
Source: Royal Society of Chemistry journal article supplement (doi:10.1039/d3ay01455j), 2024-01-01
Supplement: d3ay01455j1.pdf [file d3ay01455j1.pdf]

## Supplementary information

### Simple Photoelectrochemical Aptasensor Based on MoS<sub>2</sub>/rGO for Aflatoxin B1 Detection in Grain Crops

Cuizhong Zhang <sup>a b c d, 1</sup>, Qiang Wang <sup>c d, 1</sup>, Chuanze Zhong <sup>a</sup>, Ye Yang <sup>a</sup>, Xuexue

Liang <sup>a</sup>, Peican Chen <sup>\*a</sup>, Liya Zhou <sup>\*a</sup>

<sup>a</sup> School of Chemistry and Chemical Engineering, Guangxi University, Nanning 530004, China

<sup>b</sup> Photochemical Sensing and Regional Environmental Analysis Laboratory, School of chemistry and Bioengineering, Guangxi Normal University for Nationalities, Chongzuo 532200, China

<sup>c</sup> Guangxi Key Laboratory for High-value Utilization of Manganese Resources, Chongzuo 532200, China

<sup>d</sup> Chongzuo Key Laboratory of Comprehensive Utilization Technology of Manganese Resources, Chongzuo 532200, China

\* Authors to whom any correspondence should be addressed.

E-mail: zhouliyatf@163.com.

### 3. Results and discussion

**Table S1 Detection of aflatoxin B1 in peanuts and rice samples (n=3)**

| Samples | Added(ng/mL) | Found (ng/mL)     | RSD(%) | Recovery(%) |
|---------|--------------|-------------------|--------|-------------|
| Peanuts | 0.50         | 0.51,0.52,0.49    | 3.1    | 101.3       |
|         | 5.00         | 5.12,5.18,5.10    | 0.8    | 102.6       |
|         | 50.00        | 49.50,51.52,50.35 | 2.0    | 100.9       |
| Rice    | 0.50         | 0.49,0.52,0.48    | 4.5    | 98.0        |
|         | 5.00         | 5.11,5.02,4.92    | 1.9    | 100.4       |
|         | 50.00        | 49.82,49.61,51.55 | 2.1    | 100.6       |
